# Supplementary material
Source: PubMed Central journal article supplement (PMC3540859)
Supplement: supp_M024208_jlr.M024208-1.pdf [file supp_M024208_jlr.M024208-1.pdf]

Supplement Table 1. Primers of real-time PCR for mouse tissue gene

|                | <b>Forward primer</b>    | <b>Reverse primer</b>  |
|----------------|--------------------------|------------------------|
| <i>Ppara</i>   | tgcagagcaacatccaga       | acccgtaattaatggcgaat   |
| <i>Ppard</i>   | gcctcgggcttccactac       | agatccgatcgcacttctca   |
| <i>Pparg</i>   | gagtgtgacgacaagatttg     | ggtgggccagaatggcatct   |
| <i>Aco1</i>    | atcacgggcacttatgc        | tctcacggatagggaca      |
| <i>Cpt1b</i>   | gatgtttgcagagcacggca     | ccaggtacctgctcacggta   |
| <i>Pdk4</i>    | gaccgcttagtaacac         | gtaacgggggtccactg      |
| <i>Cd36</i>    | aatggcacagacgcagcct      | ggttgtctggattctgga     |
| <i>Lpl</i>     | tctgtacggcacagtgg        | cctctcgatgacgaagc      |
| <i>Adrp</i>    | ctacgacgacaccgat         | cattgcggaatacggag      |
| <i>Tip4</i>    | tactgcagcagcagcagcaggagc | tcttctggttccagctgagc   |
| <i>Oxpat</i>   | tgaggcagagcaaaccgtac     | atccactgcattctgcagctc  |
| <i>Atgl</i>    | cgccttgctgagaatccat      | agtgagtggctggtgaaaggt  |
| <i>Bnp</i>     | aggtttgctatctggca        | atgtcgaagttaaggctctgga |
| <i>b-actin</i> | aggcccagagcaagagaggtta   | ggggtgttgaaggtctcaaca  |

Supplement Table 2. Fatty-CoA Composition

| Fatty Acid<br>(nmol/g) | WT          | MHC- DGAT1  | MHC-PPAR $\gamma$ | MHC-DGAT1<br>XMHC-PPAR $\gamma$ |
|------------------------|-------------|-------------|-------------------|---------------------------------|
| C14:1                  | 1.88±0.77   | 1.08±0.77   | 0.23±0.09         | 0.28±0.19*                      |
| C14:0                  | 3.32±1.47   | 2.54±1.03   | 1.01±0.38         | 1.39±0.88                       |
| C16:0                  | 4.14±1.49   | 3.38±1.31   | 3.19±1.58         | 3.42±1.26                       |
| C16:1                  | 2.48±0.63   | 1.72±1.07   | 0.72±0.42         | 0.85±0.54*                      |
| C18:3                  | 0.30±0.15   | 0.18±0.14   | 0.051±0.053       | 0.072±0.047                     |
| C18:2                  | 8.13±0.88   | 6.18±1.60*  | 4.03±1.82         | 3.59±1.15**                     |
| C18:1                  | 14.11±1.08  | 9.10±3.76*  | 4.84±2.76         | 4.98±2.34**                     |
| C18:0                  | 3.14±0.59   | 3.76±0.41   | 1.85±1.00         | 1.95±0.61*                      |
| C20:5                  | 0.11±0.07   | 0.033±0.031 | 0.005±0.004       | 0.036±0.025 <sup>##</sup>       |
| C20:4                  | 1.52±0.40   | 1.40±0.44   | 0.26±0.08         | 0.24±0.05**                     |
| C20:1                  | 1.383±1.59  | 1.31±0.98   | 0.20±0.11         | 0.28±0.20                       |
| C20:0                  | 0.061±0.045 | 0.042±0.035 | 0.008±0.007       | 0.010±0.010 *                   |
| C22:6                  | 0.79±0.35   | 0.83±0.27   | 0.48±0.18         | 0.44±0.17                       |
| Total                  | 42.39±7.25  | 31.8±10.85  | 16.88±7.72        | 17.576*                         |

(<sup>#</sup> $P < 0.05$  of LSD- $t$  test followed ONE-WAY ANOVA test with \* $P < 0.05$  and \*\* $P < 0.01$ ,  $n = 4-6$ )

### Supplement Table 3. Gene expression in females

| Genes                              | WT     | MHC-DGAT1 | MHC-PPAR $\gamma$ | MHC-DGAT1<br>XMHC-PPAR $\gamma$ |
|------------------------------------|--------|-----------|-------------------|---------------------------------|
| Genes involved in Lipid Metabolism |        |           |                   |                                 |
| <i>Ppara</i>                       | 100±28 | 184±318   | 153±67            | 131±24                          |
| <i>Ppard</i>                       | 100±49 | 162±44    | 65±37             | 74±19                           |
| <i>Pparg</i>                       | 100±61 | 177±55    | 1046±375          | 1074±301**                      |
| <i>Atgl</i>                        | 100±18 | 198±62    | 241±117           | 64±28 *#                        |
| <i>Cd36</i>                        | 100±37 | 132±32    | 429±27            | 84±37 ***#                      |
| <i>Aco</i>                         | 100±33 | 157±51    | 197±78            | 78±31*#                         |
| <i>Pdk4</i>                        | 100±34 | 175±60    | 52±22             | 22±13*#                         |
| <i>Cpt1</i>                        | 100±31 | 131±42    | 187±65            | 161±85*                         |
| Gene Involved in Heart Failure     |        |           |                   |                                 |
| <i>Bnp</i>                         | 100±56 | 111±75    | 373±153           | 242±98*                         |

(# $P < 0.05$  of LSD-t test followed ONE-WAY ANOVA test with \* $P < 0.05$  and \*\* $P < 0.01$ ,  $n = 4-6$ )
